# Supplementary material for: Safety and Effectiveness of Lenvatinib in Patients with Unresectable Hepatocellular Carcinoma in Real-World Clinical Practice: An Observational Post-Marketing Study in Japan
Source: PubMed Central journal article supplement — Drugs Real World Outcomes. 2023 Jan 5;10(2):195–205. doi: 10.1007/s40801-022-00348-w (PMC10232401; doi:10.1007/s40801-022-00348-w), 2023-01-05
Supplement: 40801_2022_348_MOESM1_ESM.pdf [file 40801_2022_348_MOESM1_ESM.pdf]

## Supporting Information

### **Article Title**

Safety and effectiveness of lenvatinib in patients with unresectable hepatocellular carcinoma in real-world clinical practice: an observational post-marketing study in Japan

### **Journal**

*Drugs - Real World Outcomes*

### **Authors**

Junji Furuse, Namiki Izumi, Kenta Motomura, Yoshitaka Inaba, Yoshio Katamura, Yasuteru Kondo, Kazuhisa Yabushita, Katsuaki Motoyoshi, Masatoshi Kudo

### **Corresponding Author**

Junji Furuse

Kanagawa Cancer Center

2-3-2 Nakao, Asahi-ward, Yokohama 241-8515, Japan

Tel: +81-045-520-2222, E-mail: junjifuruse@yahoo.co.jp

Table S1. Assessment schedule

| Assessments                                         | Enrollment | CRF 1                                                                                        |                                                                                 | CRF 2          |                |
|-----------------------------------------------------|------------|----------------------------------------------------------------------------------------------|---------------------------------------------------------------------------------|----------------|----------------|
|                                                     |            | Pre-dose                                                                                     | Month 3                                                                         | Month 6        | Month 12       |
| Consent/Registration                                | x          |                                                                                              |                                                                                 |                |                |
| Patient background                                  | x          | x                                                                                            |                                                                                 |                |                |
| Treatment status                                    |            |                                                                                              | x                                                                               |                | x              |
| Concomitant therapy/medications for HCC             |            |                                                                                              | x                                                                               |                | x              |
| Medications for hepatic encephalopathy <sup>a</sup> |            |                                                                                              | x                                                                               |                | x              |
| Tumor response by imaging data <sup>b</sup>         |            |                                                                                              | x <sup>d</sup>                                                                  | x <sup>d</sup> | x <sup>d</sup> |
| Survival outcome                                    |            |                                                                                              | x                                                                               |                | x              |
| Child-Pugh score                                    |            | x                                                                                            | x <sup>d</sup>                                                                  | x <sup>d</sup> | x <sup>d</sup> |
| Laboratory tests <sup>c</sup>                       |            | Assessed from pre-dose to the end of 12-month observation (or discontinuation), if performed |                                                                                 |                |                |
| Adverse event                                       |            |                                                                                              | Assessed from the start to the end of 12-month observation (or discontinuation) |                |                |

x = performed

Data were collected using the two CRFs: 1) from the start of dosing to 3 months and 2) from 3 to 12 months after treatment initiation.

<sup>a</sup>Medications for prevention of hepatic encephalopathy; medications considered as a risk for hepatic encephalopathy-related adverse events (diuretics and analgesics); and medications requiring precautions for co-administration with lenvatinib (P-gp inhibitors and CYP3A/P-gp inducers)

<sup>b</sup>Best overall response during each time period (i.e., from the start of dosing to 3 months, 3 to 6 months, and 6 to 12 months after treatment initiation)

<sup>c</sup>Once the treatment was initiated, only laboratory tests related to adverse events were evaluated

<sup>d</sup>Only if assessments were performed

CRF, case report form; HCC, hepatocellular carcinoma

Table S2. Factors associated with the long treatment duration<sup>a</sup> identified in multivariate logistic regression analysis

| Variable                                | Category | OR (95% CI)         | P-value |
|-----------------------------------------|----------|---------------------|---------|
| ECOG PS                                 | 0        | reference           |         |
|                                         | ≥1       | 0.429 (0.277–0.664) | <0.001  |
| Portal vein invasion                    | No       | reference           |         |
|                                         | Yes      | 0.506 (0.325–0.789) | 0.002   |
| HAIC                                    | No       | reference           |         |
|                                         | Yes      | 3.091 (1.596–5.986) | <0.001  |
| mALBI grade                             | 1        | reference           |         |
|                                         | 2a       | 0.751 (0.476–1.185) | 0.218   |
|                                         | ≥2b      | 0.436 (0.283–0.670) | <0.001  |
| eGFR (mL/min/1.73m <sup>2</sup> )       | ≥45      | reference           |         |
|                                         | <45      | 0.477 (0.266–0.855) | 0.012   |
| AFP level (ng/mL)                       | <200     | reference           |         |
|                                         | ≥200     | 0.560 (0.384–0.818) | 0.002   |
| Concomitant therapy/medications for HCC | No       | reference           |         |
|                                         | Yes      | 4.588 (2.654–7.933) | <0.001  |

<sup>a</sup>The duration longer than the median treatment duration of the population ( 177 days) was defined as the long treatment period.

OR, odds ratio; CI, confidence interval; ECOG PS, Eastern Cooperative Oncology Group performance status; HAIC, hepatic arterial infusion chemotherapy; mALBI grade, modified albumin-bilirubin grade; eGFR, estimated glomerular filtration rate; AFP, alpha-fetoprotein; HCC, hepatocellular carcinoma

Table S3. Factors associated with the incidence of ADRs that led to treatment discontinuation, identified in multivariate logistic regression analysis

| Variable                                | Category | OR (95% CI)         | P-value |
|-----------------------------------------|----------|---------------------|---------|
| Sex                                     | Male     | reference           |         |
|                                         | Female   | 1.850 (1.201–2.849) | 0.005   |
| ECOG PS                                 | 0        | reference           |         |
|                                         | ≥1       | 2.043 (1.345–3.102) | <0.001  |
| Previous TKI therapy                    | No       | reference           |         |
|                                         | Yes      | 0.533 (0.324–0.877) | 0.013   |
| Previous TACE procedures (times)        | No       | reference           |         |
|                                         | <3       | 1.482 (0.899–2.443) | 0.123   |
|                                         | ≥3       | 2.164 (1.331–3.518) | 0.001   |
| mALBI grade                             | 1        | reference           |         |
|                                         | 2a       | 1.624 (0.999–2.641) | 0.050   |
|                                         | ≥2b      | 2.023 (1.284–3.187) | 0.002   |
| Concomitant therapy/medications for HCC | No       | reference           |         |
|                                         | Yes      | 0.581 (0.343–0.986) | 0.044   |

ADR, adverse drug reaction; OR, odds ratio; CI, confidence interval; ECOG PS, Eastern Cooperative Oncology Group performance status; TKI, tyrosine kinase inhibitor; TACE, transcatheter arterial chemoembolization; mALBI grade, modified albumin-bilirubin grade; HCC, hepatocellular carcinoma

Table S4. Factors associated with the occurrence of hepatic encephalopathy, identified in multivariate logistic regression analysis

| Variable                                             | Category | OR (95% CI)           | P-value |
|------------------------------------------------------|----------|-----------------------|---------|
| Extrahepatic lesions                                 | No       | reference             |         |
|                                                      | Yes      | 0.355 (0.134–0.939)   | 0.036   |
| mALBI grade                                          | 1        | reference             |         |
|                                                      | 2a       | 2.161 (0.411–11.347)  | 0.362   |
|                                                      | ≥2b      | 5.568 (1.241–24.991)  | 0.024   |
| Medications for prevention of hepatic encephalopathy | No       | reference             |         |
|                                                      | Yes      | 11.736 (5.303–25.973) | <0.001  |

OR, odds ratio; CI, confidence interval; mALBI grade, modified albumin-bilirubin grade

Table S5. Factors associated with the achievement of objective response<sup>a</sup> identified in multivariate logistic regression analysis

| Variable             | Category | OR (95% CI)         | P-value |
|----------------------|----------|---------------------|---------|
| Extrahepatic lesions | Yes      | reference           |         |
|                      | No       | 0.542 (0.342–0.859) | 0.009   |
| mALBI grade          | 1        | reference           |         |
|                      | 2a       | 0.484 (0.291–0.808) | 0.005   |
|                      | ≥2b      | 0.431 (0.263–0.708) | <0.001  |

<sup>a</sup>Objective response was defined as complete response and partial response.

OR, odds ratio; CI, confidence interval; mALBI grade, modified albumin-bilirubin grade
